# Supplementary material for: State-to-state vacuum ultraviolet photodissociation study of CO2 on the formation of state-correlated CO(X1Σ+; v) with O(1D) and O(1S) photoproducts at 11.95–12.22 eV
Source: Royal Society of Chemistry journal article supplement (doi:10.1039/c5cp01321f), 2015-01-01
Supplement: c5cp01321f1.pdf [file c5cp01321f1.pdf]

## Supplementary material

### **State-to-state vacuum ultraviolet photodissociation study of CO<sub>2</sub> on the formation of state-correlated CO(*X*<sup>1</sup>Σ<sup>+</sup>; *v*) with O(<sup>1</sup>D) and O(<sup>1</sup>S) photoproducts at 11.95-12.22 eV**

Zhou Lu,<sup>a</sup> Yih Chung Chang,<sup>a</sup> Yanice Benitez,<sup>a</sup> Zhihong Luo,<sup>a</sup> Adel Ben Houria,<sup>b</sup> Tarek Ayari,<sup>b</sup>  
Muneerah Mogren Al Mogren,<sup>c</sup> M. Hochlaf,<sup>\*d</sup> W. M. Jackson,<sup>\*a</sup> and C. Y. Ng<sup>\*a</sup>

- a) Department of Chemistry, University of California, Davis, CA 95616, USA  
E-mail: [wmjackson@ucdavis.edu](mailto:wmjackson@ucdavis.edu), and [c yng@ucdavis.edu](mailto:c yng@ucdavis.edu)
- b) Laboratoire de Spectroscopie Atomique, Moléculaire et Applications – LSAMA, Université de Tunis El Manar, Tunis, Tunisia
- c) Chemistry Department, Faculty of Science, King Saud University, PO Box 2455, Riyadh 11451, Kingdom of Saudi Arabia
- d) Université Paris-Est, Laboratoire Modélisation et Simulation Multi Echelle, MSME UMR 8208 CNRS, 5 bd Descartes, 77454 Marne-la-Vallée, France.  
E-mail: [hochlaf@univ-mlv.fr](mailto:hochlaf@univ-mlv.fr)

**Figure S1:** One-dimensional evolution of the MRCI/aug-cc-pV5Z potential energy surfaces of the singlet electronic states of  $\text{CO}_2$  along the  $R_{\text{CO}}$  for several bending angles where the other CO distance is kept fixed to 2.0-2.9 Bohr. The energies are given with respect to the energy of  $\text{CO}_2$  ground state at equilibrium.

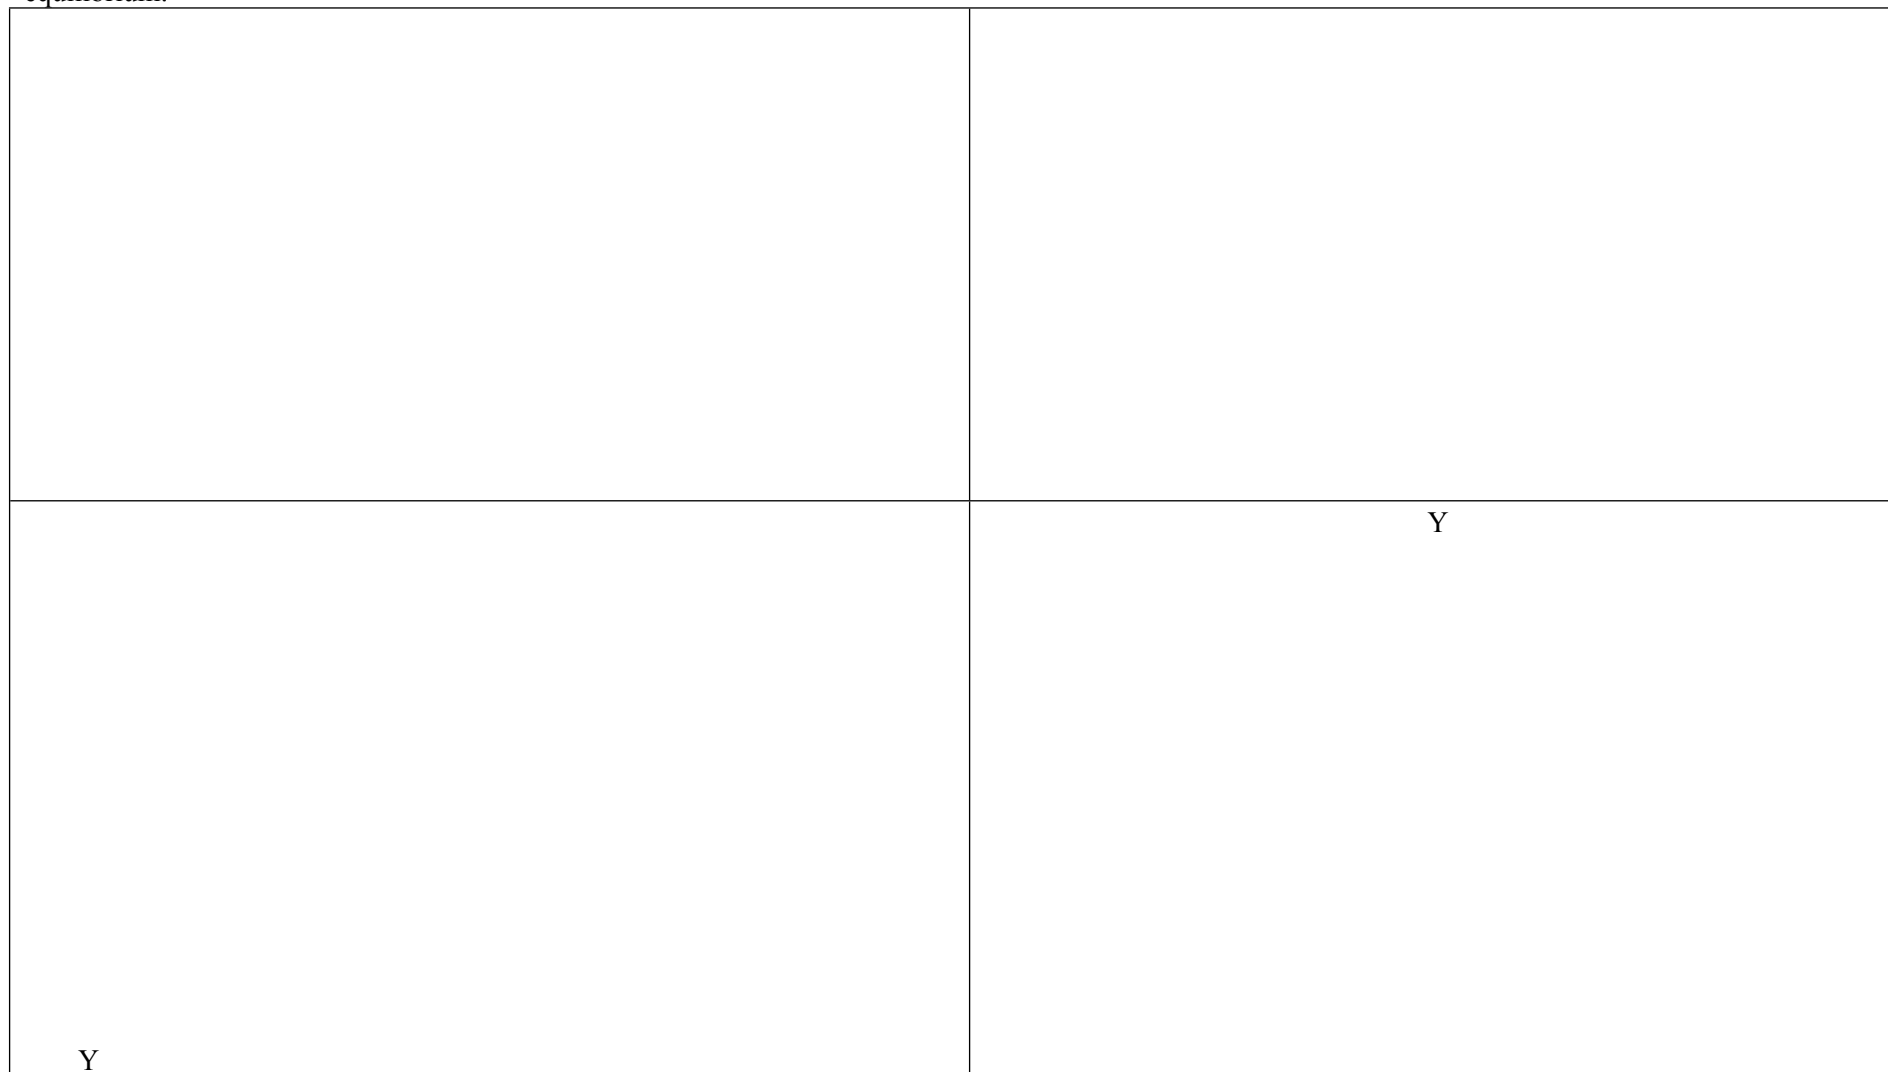

|  |  |
|--|--|
|  |  |
|  |  |

|  |  |
|--|--|
|  |  |
|  |  |

|  |  |
|--|--|
|  |  |
|  |  |

|  |  |
|--|--|
|  |  |
|  |  |

|  |  |
|--|--|
|  |  |
|  |  |

|  |  |
|--|--|
|  |  |
|  |  |



|  |  |
|--|--|
|  |  |
|  |  |

|  |  |
|--|--|
|  |  |
|  |  |

|  |  |
|--|--|
|  |  |
|  |  |
